## Erratum: “Control of Flexible-Link Multiple Manipulators” [ASME J. Dyn. Syst., Meas., and Control, 124, No. 1, pp. 64–75]

Qiao Sun

In the above paper, the vertical axis labels for Figs. 5, 6, and 7 were illegible. Corrected figures are provided below.

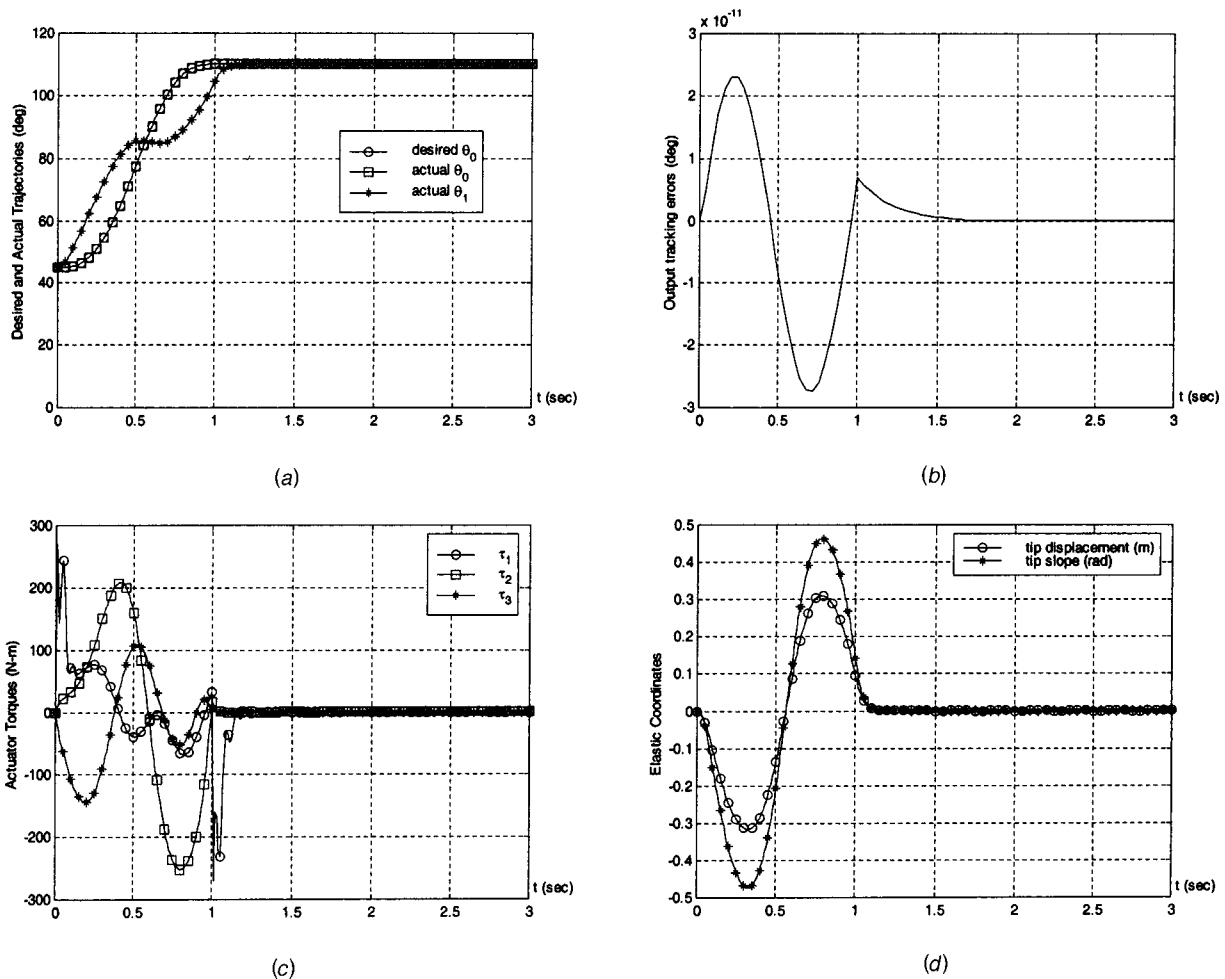

Fig. 5 Simulation results for case 1

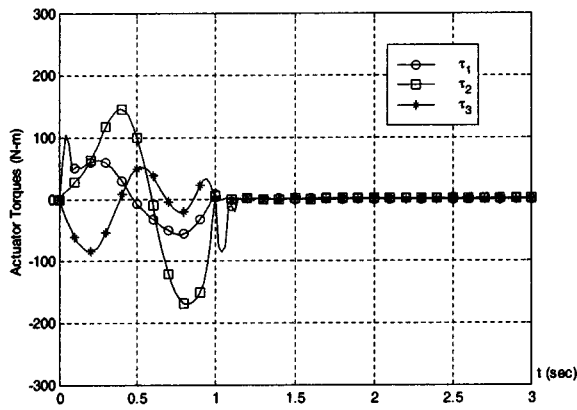

(a)

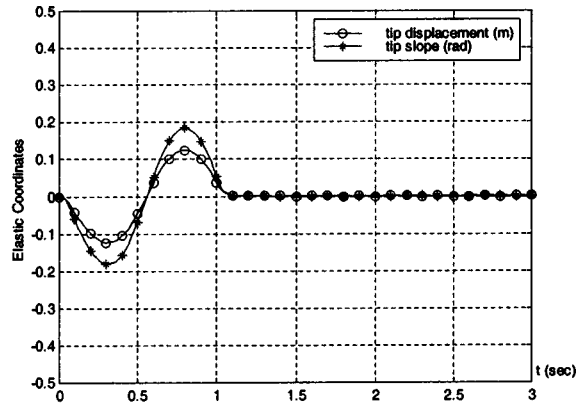

(b)

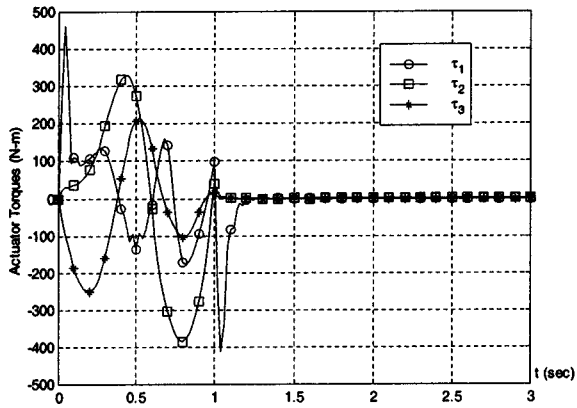

(c)

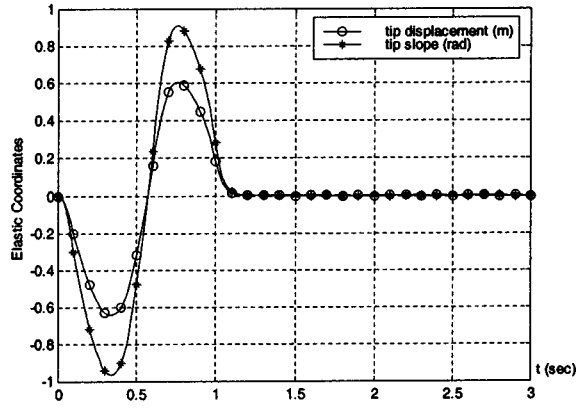

(d)

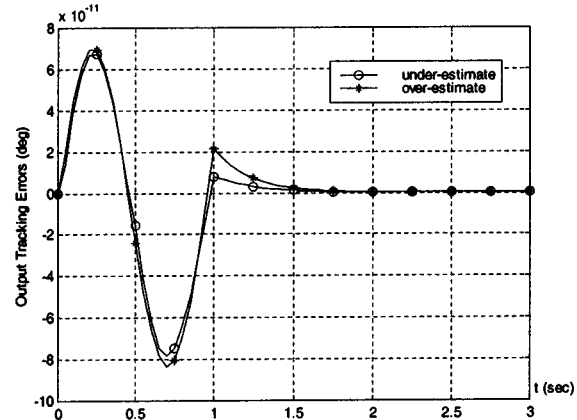

(e)

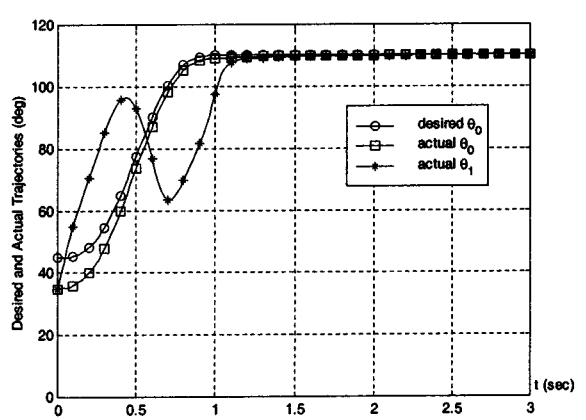

(f)

Fig. 6 Simulation results for case 2

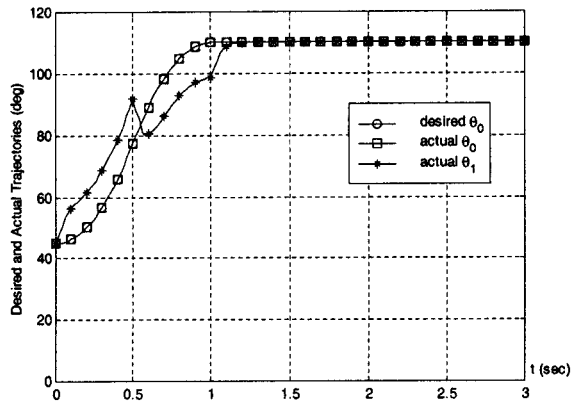

(a)

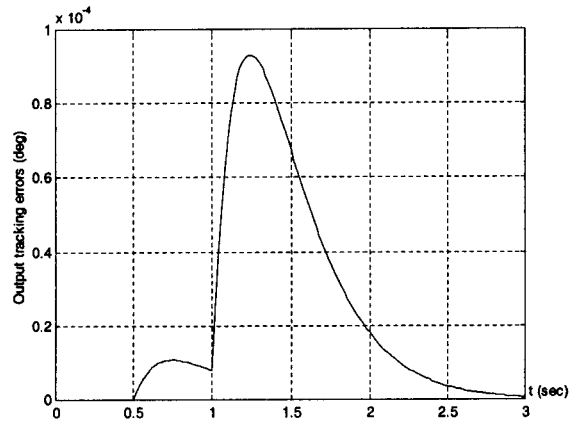

(b)

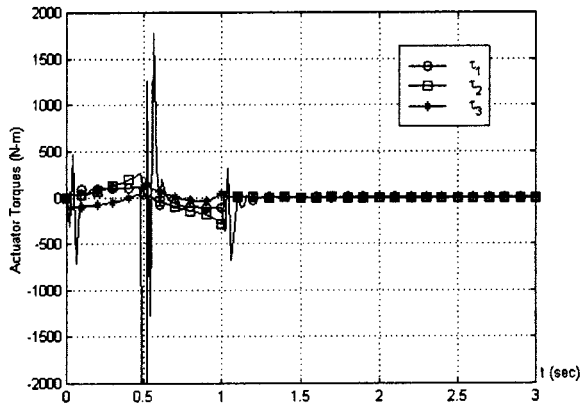

(c)

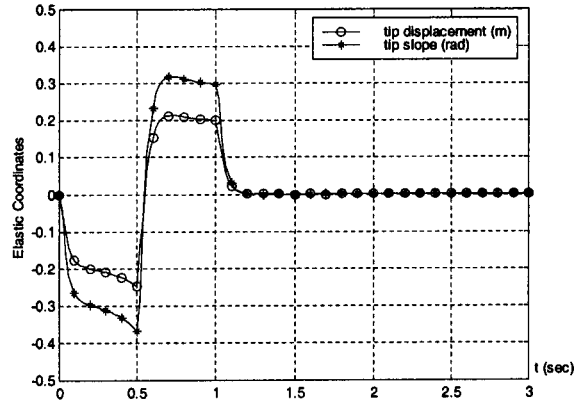

(d)

Fig. 7 Simulation results for case 3
